# Deletion of RD1 from *Mycobacterium tuberculosis* Mimics Bacille Calmette-Guérin Attenuation

Kaeryn N. Lewis,<sup>1,2</sup> Reiling Liao,<sup>2</sup> Kristi M. Guinn,<sup>2</sup> Mark J. Hickey,<sup>2</sup> Sherilyn Smith,<sup>1</sup> Marcel A. Behr,<sup>3</sup> and David R. Sherman<sup>2</sup>

Departments of <sup>1</sup>Pediatrics and <sup>2</sup>Pathobiology, University of Washington, Seattle; <sup>3</sup>Department of Microbiology and Immunology, McGill University, Montreal, Quebec, Canada

The tuberculosis (TB) vaccine bacille Calmette-Guérin (BCG) is a live attenuated organism, but the mutation responsible for its attenuation has never been defined. Recent genetic studies identified a single DNA region of difference, RD1, which is absent in all BCG strains and present in all *Mycobacterium tuberculosis* (MTB) strains. The 9 open-reading frames predicted within this 9.5-kb region are of unknown function, although they include the TB-specific immunodominant antigens ESAT-6 and CFP-10. In this study, RD1 was deleted from MTB strain H37Rv, and virulence of H37Rv:ΔRD1 was assessed after infections of the human macrophage-like cell line THP-1, human peripheral blood monocyte-derived macrophages, and C57BL/6 mice. In each of these systems, the H37Rv:ΔRD1 strain was strikingly less virulent than MTB and was very similar to BCG controls. Therefore, it was concluded that genes within or controlled by RD1 are essential for MTB virulence and that loss of RD1 was important in BCG attenuation.

Bacille Calmette-Guérin (BCG), the world's tuberculosis (TB) vaccine, has been controversial since its first use in 1921 [1]. Since then, BCG has been administered to >3 billion people [2], with an excellent safety record [3]. Currently, an estimated 118 million doses are delivered each year [2]. However, in controlled clinical trials, the efficacy of BCG for preventing pulmonary TB has ranged widely, with some studies reporting no efficacy at all [4]. Despite high vaccination rates in

much of the world, the ongoing death toll of TB remains ~2 million deaths per year [5]. BCG is a live attenuated derivative of virulent *Mycobacterium bovis*, a close relative of *M. tuberculosis* (MTB). BCG was the result of more than a decade of continuous passage in vitro, but the genetic event responsible for its loss of virulence has never been defined. Understanding the molecular basis of BCG attenuation not only will provide insight into mechanisms of MTB pathogenesis but also will provide the impetus for much needed improvements in the TB vaccine.

Recent work has identified several regions of the MTB chromosome that are missing from various BCG substrains [6–9]. Of these, only 1 region of difference, RD1, is missing from every BCG strain analyzed to date but is present in every MTB [10, 11]. RD1 is the only known BCG mutation that may have occurred before clinical use of BCG in 1921 [8]. By annotation [12], the ~9.5-kb RD1 deletion completely removes 7 genes (*Rv3872–Rv3878*) and truncates 2 others (*Rv3871* and *Rv3879c*). None of the affected genes has any known function, although 2 encode the MTB-specific secreted

Received 1 July 2002; revised 12 September 2002; electronically published 2 December 2002.

Presented in part: 37th US-Japan Conference on Tuberculosis and Leprosy, Kyoto, Japan, 21–23 August 2002.

Financial support: National Institutes of Health (grants HL64550 and HL68533); Canadian Institutes of Health Research (grant GOP\_36054; M.A.B. is a New Investigator); Sequella Global Tuberculosis Foundation (D.R.S. and M.A.B. are Core Scientists).

Reprints or correspondence: Dr. David R. Sherman, Dept. of Pathobiology, University of Washington, Box 357238, Seattle, WA 98195-7238 (Dsherman@u.washington.edu).

The Journal of Infectious Diseases 2003;187:117–23

© 2003 by the Infectious Diseases Society of America. All rights reserved.  
0022-1899/2003/18701-0016\$15.00

antigens ESAT-6 and CFP-10. In the present study, we assessed the role of the RD1 region in virulence of MTB and attenuation of BCG.

## MATERIALS AND METHODS

**Bacteria.** H37Rv (ATCC 27294), H37Rv:ΔRD1, and *M. bovis* BCG-Russia (ATCC 35740) were grown to mid-log phase in 7H9 media with 0.05% Tween 80 and albumin, dextrose, catalase (ADC) supplement (Becton Dickinson) and were stored as 1-mL aliquots in 15% glycerol (final concentration) at  $-80^{\circ}\text{C}$ . For individual experiments, bacilli were grown in roller bottles in Middlebrook 7H9 medium (Becton Dickinson) with 0.05% Tween 80 and ADC supplement or on Middlebrook 7H10 plates at  $37^{\circ}\text{C}$ , as described elsewhere [13]. When needed,  $30\ \mu\text{g}/\text{mL}$  kanamycin ( $50\ \mu\text{g}/\text{mL}$  for *Escherichia coli*) and  $50\ \mu\text{g}/\text{mL}$  hygromycin ( $200\ \mu\text{g}/\text{mL}$  for *E. coli*) were used. Routine DNA manipulations were performed in *E. coli* DH5α (Invitrogen).

**Deletion of RD1.** To delete the RD1 region, genomic regions (~800 bp each) flanking the RD1 region were amplified by polymerase chain reaction (PCR) and were cloned into the knockout plasmid pKO, to flank the *kanR* determinant. Electroporation into mycobacteria, initial selection on 7H10 plates with hygromycin, and secondary selection on 7H10 plates containing 10% sucrose were performed as described elsewhere [8, 14]. In the first screening step, each colony was tested by PCR with 2 primer pairs: one specific for integration upstream of the gene of interest and the other specific for integration downstream. Colonies determined to be positive at either end by means of PCR were grown to an  $\text{OD}_{600}$  of ~1.0 and were plated onto 7H10 plates containing 10% sucrose. Bacilli that grow on sucrose generally either have mutated copies of *sacB* or have lost the integrated plasmid. A portion of those in which the plasmid was lost also will lose the gene of interest. Colonies appearing on sucrose plates were placed into medium and were patched separately onto 7H10 plates with kanamycin and hygromycin. Sucrose-resistant, hygromycin-sensitive, and kanamycin-resistant colonies (which indicates loss of the integrated plasmid) were screened by use of PCR for loss of the gene of interest, and the deletion was confirmed by means of Southern blot.

**Preparation of macrophages.** To prepare the human macrophage-derived THP-1 cell line for infection, cells were pelleted by centrifugation, resuspended in RPMI 1640 medium plus 10% fetal calf serum (FCS) with 100 nM phorbol 12-myristate 13-acetate (PMA; Sigma), and delivered ( $5 \times 10^5$  cells in 0.5 mL) into 24-well tissue culture plates. Cells were incubated at  $37^{\circ}\text{C}$  with 5%  $\text{CO}_2$  for 48 h. PMA-containing medium then was removed from the wells, cells were washed with warm RPMI 1640 medium, given fresh RPMI 1640 medium plus FCS, and reincubated for 24 h before infection. Peripheral blood mononuclear cells (PBMC) were isolated from healthy vol-

unteers by centrifugation of fresh whole blood diluted 2:1 with RPMI 1640 medium on Histopaque-1077 (Sigma) for 30 min at 600 g at  $18^{\circ}\text{C}$ . PBMC were washed 3 times with cold RPMI 1640 medium, resuspended in RPMI 1640 medium with 10% human serum at  $6 \times 10^6$  cells/mL, and plated at 0.5 mL volume into 24-well tissue culture plates. After 2 h of incubation at  $37^{\circ}\text{C}$  in 5%  $\text{CO}_2$ , nonadherent cells were removed with 3 washes of warm RPMI 1640 medium, and remaining cells were reincubated with RPMI 1640 medium plus 10% human serum for 4–6 days before infection. Adherent cells were counted in 3 wells to determine the MOI.

**Macrophage infections.** For each infection, bacteria stocks were grown to mid-log phase in 7H9 media, diluted in warm RPMI 1640 medium plus 10% FCS (THP-1) or human serum (PBMC), and added to each well containing  $\sim 3 \times 10^5$  cells at an MOI of 1. Cells were incubated at  $37^{\circ}\text{C}$  in 5%  $\text{CO}_2$ . After 4 h, extracellular bacteria were removed by 3 washes with warm RPMI, and cells received fresh media (RPMI 1640 medium plus 10% serum). At each time point, triplicate wells for each bacterial strain were processed. Supernatants were removed, adherent cells were lysed with 1% Triton X-100, and bacterial numbers were determined for each by plating for colony-forming units and/or by means of luciferase assay, which was performed as described elsewhere [14, 15]. Relative light units (rlu) from luciferase assays were converted to the number of bacilli by applying a strain-specific conversion factor derived from several plating experiments: H37Rv, 0.000283 rlu/bacillus; H37Rv:ΔRD1, 0.000442 rlu/bacillus; and BCG-Russia, 0.000206 rlu/bacillus. Macrophage metabolism was measured by metabolism of an oxidation-reduction dye (AlamarBlue; Biosource International), as an indication of cytotoxicity. AlamarBlue reagent at  $1 \times$  in RPMI was added to wells, and, after 6 h incubation, results were measured at  $\text{OD}_{600}$  and  $\text{OD}_{570}$ . Percentage of reduction of AlamarBlue was calculated according to the manufacturer's instructions.

**Aerosol infection of mice.** Aerosol infections of mice were performed as described elsewhere [16]. C57BL/6 mice, aged 6–8 weeks, were obtained from Jackson Laboratories and were maintained in a biosafety-level 3 animal facility. For each infection, frozen bacteria stocks were thawed, sonicated and diluted to  $\sim 10^6$  bacteria/mL, and nebulized in an aerosol infection chamber (Salter Labs) containing the mice. Infectious dose was determined by plating whole lung homogenates on day 1. At each time point, 5 mice/group were killed by cervical dislocation. Spleen and left lung were homogenized in PBS/0.05% Nonidet P40 and were plated into serial dilutions on 7H10 agar. Colonies were counted after 2–3 weeks of incubation at  $37^{\circ}\text{C}$ . In addition, the right lung was removed, inflated, fixed in 10% buffered formalin, embedded in paraffin, sectioned, and stained with hemotoxylin-eosin for evaluation of histopathology. For survival experiments, mice were infected as

above and were monitored 2–3 times per week for signs of advancing disease. To prevent needless suffering, mice were killed when death was imminent, as predicted by any of the following: weight loss of >20%, trembling, extreme lethargy, or labored breathing.

## RESULTS

**Targeted replacement of the RD1 region and initial strain characterization.** To test the role of the RD1 region in MTB virulence and BCG attenuation, we generated precise deletions of RD1 from the MTB genome. We used homologous recombination and sucrose counterselection to replace the RD1 region of MTB strain H37Rv with the *aph* gene, which confers resistance to kanamycin. Gene replacement was confirmed by use of both PCR across the DNA junctions and Southern blot (data not shown). Two independent isolates of H37Rv:ΔRD1 generated at different times were chosen for further analysis. H37Rv:ΔRD1 clones were compared with virulent parent strain H37Rv and with attenuated BCG-Russia (ATCC 35740), which was chosen because it is potentially more similar to the original BCG than other extant BCG strains [8]. During 3 weeks in 7H9 broth in vitro, growth and survival of the 3 strains were indistinguishable (data not shown).

**Analysis of infected macrophages in culture.** The macrophage is the primary cell type to interact directly with MTB in vivo [17], and growth in cultured macrophages has been used to assess virulence of different mycobacterial strains [18, 19]. As an initial test of the role of the RD1 region in virulence, the ability of H37Rv, H37Rv:ΔRD1, and BCG-Russia to infect and grow within the human macrophage–like THP-1 cell line was assessed (figure 1A). Consistent with published data [15], H37Rv infected and multiplied well within THP-1 cells, reaching >10 times their original number in 4 days. Reduced replication of H37Rv at later time points correlated with damage to the infected macrophages. By day 7, the H37Rv-infected THP-1 cell monolayer was destroyed >80%, as judged by both microscopy (data not shown) and reduction of an indicator dye (figure 1B). In comparison, BCG-Russia failed to grow inside THP-1 cells over the course of these experiments, and, after 7 days, the BCG-Russia–infected monolayer was intact >90% (figure 1A and 1B). The growth of H37Rv:ΔRD1 was intermediate, increasing 3-fold in 7 days, with essentially no damage to the THP-1 monolayer (figure 1A and 1B). We also infected PBMC from human donors (figure 1C). Again, H37Rv grew well, BCG-Russia grew minimally, and H37Rv:ΔRD1's growth was strikingly similar to BCG-Russia.

**Analysis of murine infections.** To characterize further the effect of the RD1 region on growth and virulence of MTB, we introduced H37Rv:ΔRD1 and control strains into the lungs of C57BL/6 mice. These mice are relatively resistant to infection

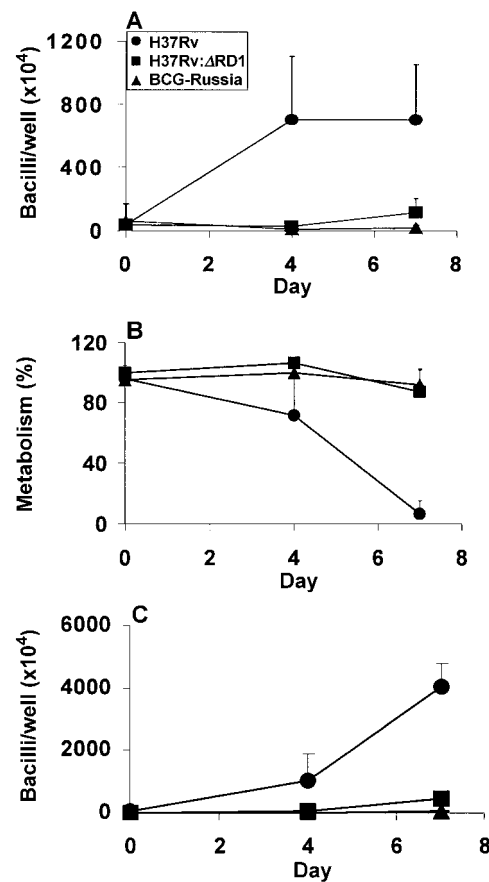

**Figure 1.** Bacterial growth and cytotoxicity in a human macrophage THP-1 cell line (A and B) and growth in human peripheral blood mononuclear cell (PBMC)-derived macrophages (C) after infection by H37Rv (●), H37Rv:ΔRD1 (■), or BCG-Russia (▲). Data for each time point are the mean and SD of 4 infections in panels A and B and of a representative infection (of 4) in panel C. Bacteria were quantitated by luciferase assay (A) or by plating for colony-forming units (C). Cytotoxicity is indicated by the decline in macrophage metabolism over the course of infection (B).

by MTB, although they carry the *Nrampl* allele that confers heightened susceptibility to BCG [20]. Aerosol infection was used because it mimics the most common transmission mode for human TB and because MTB is more virulent when delivered by this route [21]. In addition, we were able to evaluate each strain's ability to disseminate after aerosol inoculation of the lungs. Hematogenous seeding of the lung and the spleen is considered to be a critical step in the pathogenesis of human TB [22] and has been used to assess the relative virulence of different mycobacterial strains [23]. After infection, H37Rv numbers increased rapidly in the lungs, reaching peak levels by week 4 after infection, before decreasing to a plateau of  $\sim 1 \times 10^6$  bacilli per lung (figure 2A and 2B). Dissemination to the spleen and subsequent growth also were rapid, with bacilli numbers reaching a steady level by 2–4 weeks (figure 2C and 2D). This pattern of rapid bacterial replication, which was fol-

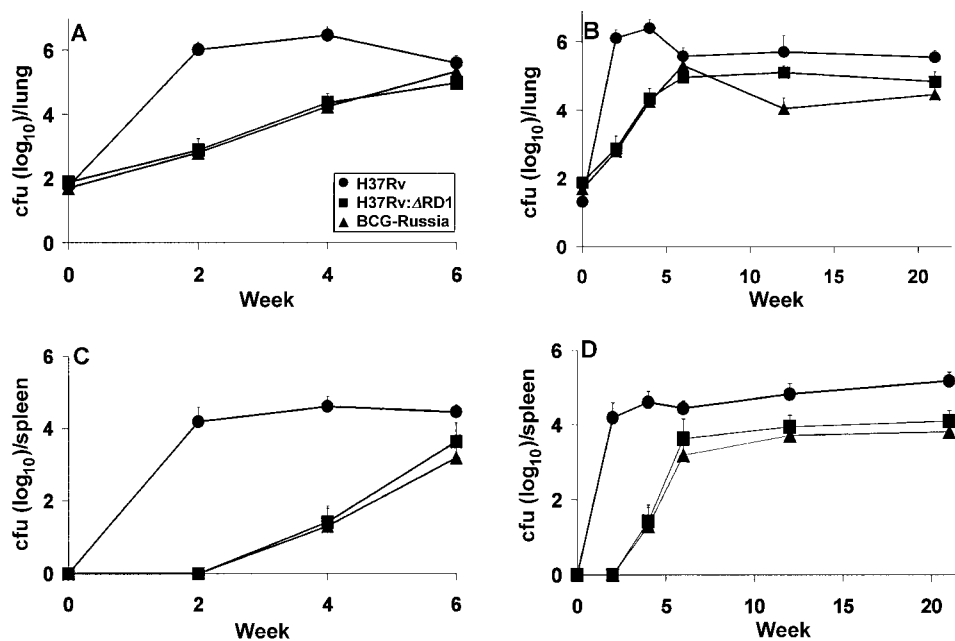

**Figure 2.** Bacterial growth in lungs (*A* and *B*) and spleens (*C* and *D*) after low-dose aerosol infection of 6–8-week-old C57BL/6 mice with wild-type H37Rv (●), H37Rv:ΔRD1 (■), or BCG-Russia (▲). *A* and *C*, Early-phase infection and dissemination. *B* and *D*, Progression of infection through 21 weeks. Data at each time point are the mean and SD of 15 mice per strain from 3 separate infections.

lowed by containment at the time that adaptive immunity normally begins to manifest, is typical of aerosol infection of TB in the mouse [24]. In striking contrast, infection with H37Rv:ΔRD1 or BCG-Russia bacilli resulted in slow growth in the lungs (figure 2*A* and 2*B*) and delayed dissemination to the spleen (figure 2*C* and 2*D*). By week 2 after infection, levels of H37Rv:ΔRD1 and BCG-Russia were ~4 log lower than that of H37Rv in each organ. The containment phase of the infection also was altered. H37Rv:ΔRD1 and BCG-Russia numbers increased steadily for 6 weeks, a full month beyond the point when replication of H37Rv had slowed. By week 6 after infection, levels of H37Rv:ΔRD1 and BCG-Russia were only ~10-fold lower than levels of H37Rv. This pattern was maintained throughout the 21-week experiment.

Although the bacterial burden *in vivo* was ultimately similar with all 3 strains, marked differences in lung histopathology were revealed. By week 6 after infection, lungs of mice infected with H37Rv showed widespread inflammation involving ~50% of the lung tissue, with organized multifocal granulomas (figure 3*A* and 3*D*). In contrast, lungs from H37Rv:ΔRD1 or BCG-Russia-infected mice were predominantly normal with only early perivascular lymphocytic infiltration and no granuloma formation (figure 3*B*, 3*C*, 3*E*, and 3*F*). Lungs from mice infected with H37Rv:ΔRD1 or BCG-Russia were indistinguishable from each other. By week 21 after infection, lungs from H37Rv-infected mice were characterized by diffuse inflammation that involved >75% of the lung tissue (figure 3*G*). In contrast, al-

though numbers of H37Rv:ΔRD1 and BCG-Russia continued to increase in lungs for several weeks beyond when growth of H37Rv was controlled, lung pathology was not simply delayed. Damage in H37Rv:ΔRD1- and BCG-Russia-infected lungs remained extremely mild throughout the 21 weeks, with only modest perivascular collections of relatively unorganized lymphocytes and macrophages that were slightly larger than those appearing at 6 weeks after infection but still involved <10% of lung tissue (figure 3*H* and 3*I*). Inflammation remained perivascular and never developed into parenchymal or granulomatous disease, as was seen by week 6 after infection with H37Rv.

One of the clearest laboratory tests of mycobacterial virulence is to assess survival of infected animals [25]. Accordingly, mice were infected by aerosol with high doses of H37Rv or H37Rv:ΔRD1 and were monitored for signs of advancing TB. Mice were killed when any of the following criteria were met: >20% weight loss, trembling, extreme lethargy, or labored breathing. Mice infected with H37Rv bacilli began to fall gravely ill by week 19 after infection (figure 4). By week 39 after infection, only 2 of the 15 mice infected with H37Rv were still alive. In contrast, the 18 mice infected with H37Rv:ΔRD1 were still alive and appeared to be healthy when the experiment was terminated at 39 weeks. Again, the phenotype of H37Rv:ΔRD1 was strikingly different from its virulent parent and was indistinguishable from BCG.

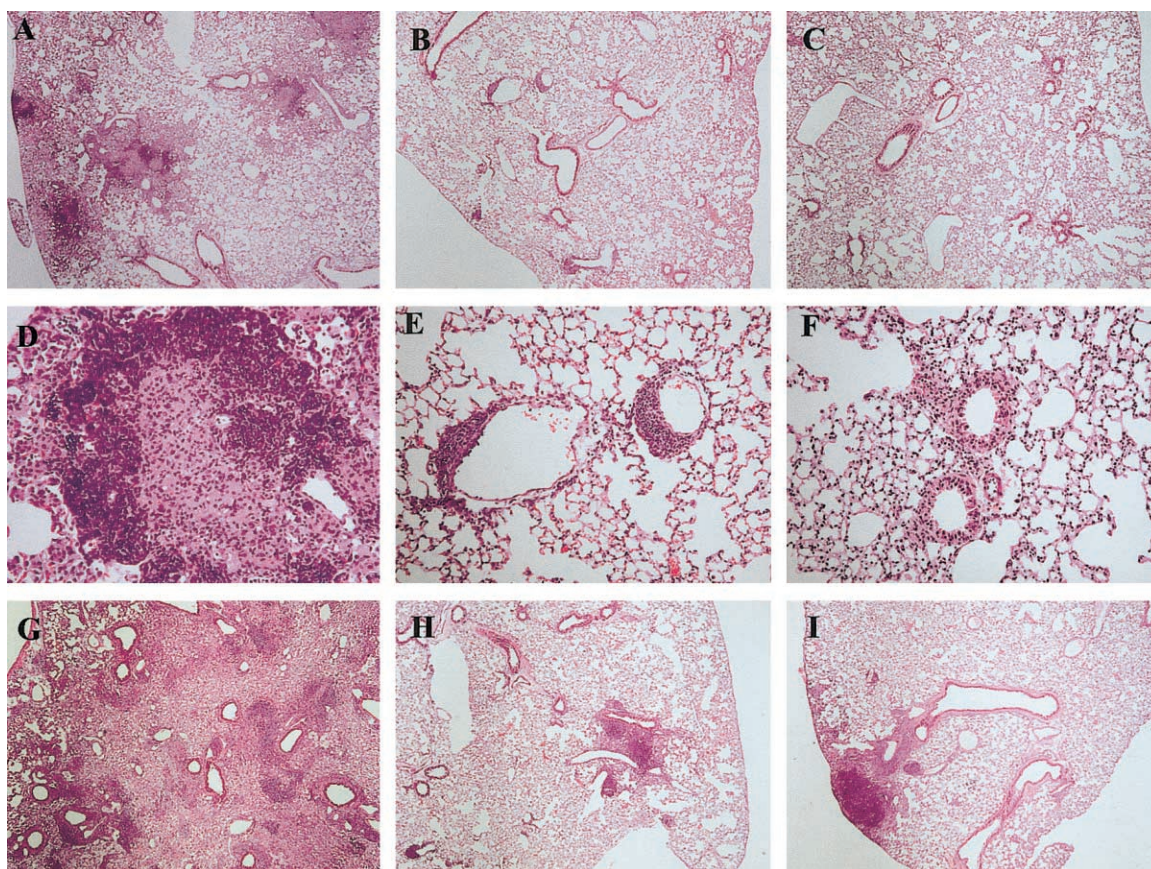

**Figure 3.** Lung histopathology after low-dose aerosol infection by H37Rv (*A*, *D*, and *G*), H37Rv:ΔRD1 (*B*, *E*, and *H*), or BCG-Russia (*C*, *F*, and *I*). At each time point, the left lung was removed, inflated, fixed in 10% buffered formalin, embedded in paraffin, sectioned, and stained with hematoxylin-eosin. Photographs shown are representative of at least 15 mice/strain. *A*, *B*, and *C*, Differences in overall lung involvement (original magnification,  $\times 10$ ) at week 6 after infection. *D*, *E*, and *F*, Differences in granuloma formation (original magnification,  $\times 50$ ; at week 6 after infection). *D*, Well-organized granuloma with tight rim of lymphocytes surrounding central core of histiocytes in a mouse infected with wild-type MTB. *E* and *F*, Areas of greatest inflammation in the H37:ΔRD1-infected (*E*) or BCG-Russia-infected (*F*) lung, consisting only of mild perivascular lymphocyte cuffs. *G*, *H*, and *I*, Differences in lung inflammation at week 21 after infection (original magnification,  $\times 10$ ).

## DISCUSSION

The nature of the mutation underlying attenuation of BCG has been a mystery since Calmette's first observations of his attenuated strain [26]. During the last decade, associations have been made regarding the origin of BCG, mycobacterial virulence, and the RD1 region or gene(s) within it [6, 8, 27]. Our data demonstrate that loss of RD1 affects MTB growth and survival in cultured macrophages and greatly alters mycobacterial growth and dissemination, as well as the resultant histopathology and survival of the mouse. In every analysis, the phenotype of H37Rv:ΔRD1 was distinctly different from that of virulent H37Rv and remarkably similar to that of BCG. These studies indicate that sequences within or controlled by the RD1 region are needed for MTB virulence and argue for the hypothesis that loss of RD1 was an important event in the creation of BCG.

The role of RD1 in virulence of MTB and attenuation of BCG is substantiated by the fact that completely independent H37Rv:ΔRD1 strains yielded the same results in cultured macrophage and mouse infection assays (data not shown). We also have deleted the RD1 region from MTB strain Erdman (ATCC 35801). In cultured macrophages, this strain is as attenuated as H37Rv:ΔRD1 (data not shown). However, thus far we have been unable to complement deletion of RD1 in the traditional fashion. For reasons that are unclear, the genes in the RD1 region expressed only very poorly after we restored the entire region into the phage L5 attachment site [28] of H37Rv:ΔRD1 (data not shown). Complementation in *trans* of a 9-gene deletion with a 12-kb DNA fragment is not straightforward. Efforts to reinstall the RD1 DNA in situ and to complement the ΔRD1 phenotypes with smaller portions of the RD1 region are underway.

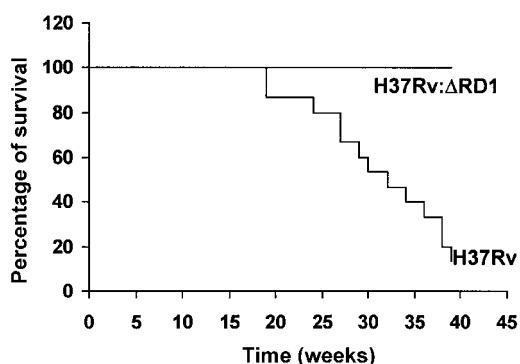

**Figure 4.** Survival of C57BL/6 mice after high-dose aerosol infection with H37Rv or H37Rv:ΔRD1. Results are from 15 mice infected with an average dose of 316 H37Rv bacilli and from 18 mice infected with an average of 730 H37Rv:ΔRD1 bacilli.

Although clearly attenuated, BCG and H37Rv:ΔRD1 were able to both grow and persist in C57BL/6 mice. Although these mice are relatively resistant to MTB, they carry the *Nramp1* allele, which confers sensitivity to BCG [20]. Previously, BCG has been shown to grow in an *Nramp*-susceptible mouse strain after aerosol infection [29]. Furthermore, although the BCG-Russia strain that we used may be a more aggressive BCG [30–32], we saw essentially identical growth in vivo after aerosol infection with BCG Pasteur (ATCC 35734; data not shown). As noted elsewhere [33], growth and persistence in vivo and the ability to induce pathology are separate manifestations of mycobacterial virulence that can be dissociated under the proper conditions.

The mechanism by which the RD1 region exerts its effects remains to be elucidated. At present, our data highlight 2 broad areas for further study. First, impaired replication in cultured macrophages and in the first weeks after aerosol challenge of mice implies that H37Rv:ΔRD1 and BCG are defective in some aspect of metabolism or response to innate host defenses that is revealed by these environments. At the same time, continued replication of these strains in mice beyond the time when H37Rv is contained and the lack of histopathology in vivo suggest that H37Rv:ΔRD1 and BCG elicit a very different adaptive immune response than virulent MTB. Perhaps expression of immunogens encoded by RD1 [34–37] at early times in vivo is necessary for induction of a powerful adaptive immune response.

It has been noted recently that ESAT-6 and CFP-10 form a tight 1:1 complex [38] and that homologues are widespread among gram-positive bacteria [39, 40]. It was suggested that these proteins may contribute to a novel bacterial secretion system, with the energy for protein export supplied by a conserved, membrane-bound ATPase encoded nearby (*Rv3870* and *Rv3871* in the RD1 region). This idea is attractive for 2 reasons. First, it provides a mechanism by which ESAT-6 and CFP-10, which lack signal sequences, may be exported from bacilli. Second, various

secretion systems are essential for virulence of many other bacterial pathogens [41]. Among other options, we are currently testing the hypothesis that RD1 deletion has interrupted a novel secretion system that is necessary for MTB virulence.

Regardless of its mechanism of action, analysis of RD1-deficient MTB could contribute to development of a better TB vaccine. The ability to multiply and persist in vivo may be necessary for a vaccine to stimulate lasting protective immunity against MTB [32, 42, 43]. Because it derives from MTB and not *M. bovis*, H37Rv:ΔRD1 should share more antigenic determinants with MTB, may persist in vivo longer than BCG, and may provoke a more protective immune response. Thus, continued focus on the RD1 region should provide novel insight into mechanisms of MTB pathogenesis, help elucidate the nature of a productive immune response, and may help stimulate much needed improvements in the TB vaccine.

## Acknowledgments

We thank Patti Kiser for constructing the RD1 knockout plasmid; Kelly Zakel and Sanjeev Mathur for performing animal infection work; Scott Weissman for helping with human monocyte experiments; and Serge Mostowy, Lalita Ramakrishnan, Christopher Wilson, Kevin Urdahl, Denny Liggitt, Rob Sladek, and Adam Belley for helpful discussions.

## References

- Bloom BR, Fine PEM. The BCG experience: implications for future vaccines against tuberculosis. In: Bloom BR, ed. Tuberculosis: pathogenesis, protection, and control. Washington, DC: American Society for Microbiology Press, 1994:531–57.
- Fine PEM, Carneiro IAM, Milstien JB, Clements CJ. Issues relating to the use of BCG in immunization programmes. Available at: <http://www.who.int/vaccines-documents/DocsPDF99/www9943.pdf>; last accessed 15 November 2002.
- Casanova JL, Blanche S, Emile JF, et al. Idiopathic disseminated bacillus Calmette-Guérin infection: a French national retrospective study. *Pediatrics* 1996; 98:774–8.
- Huebner RE. Bacillus of the Calmette and Guérin (BCG) vaccine. In: Rom WN, Garay SM, eds. Tuberculosis. Boston: Little, Brown & Company, 1996:893–904.
- Zumla A, Mwaba P, Squire SB, Grange JM. The tuberculosis pandemic: which way now? *J Infect* 1999; 38:74–9.
- Mahairas GG, Sabo PJ, Hickey MJ, Singh DC, Stover CK. Molecular analysis of genetic differences between *Mycobacterium bovis* BCG and virulent *M. bovis*. *J Bacteriol* 1996; 178:1274–82.
- Philipp WJ, Nair S, Guglielmi G, Lagranderie M, Gicquel B, Cole ST. Physical mapping of *Mycobacterium bovis* BCG pasteur reveals differences from the genome map of *Mycobacterium tuberculosis* H37Rv and from *M. bovis*. *Microbiology* 1996; 142:3135–45.
- Behr MA, Wilson MA, Gill WP, et al. Comparative genomics of BCG vaccines by whole-genome DNA microarray. *Science* 1999; 284:1520–3.
- Gordon SV, Brosch R, Billault A, Garnier T, Eiglmeier K, Cole ST. Identification of variable regions in the genomes of tubercle bacilli using bacterial artificial chromosome arrays. *Mol Microbiol* 1999; 32: 643–55.
- Mostowy S, Cousins D, Brinkman J, Aranaz A, Behr MA. Genomic

- deletions suggest a phylogeny for the *Mycobacterium tuberculosis* complex. *J Infect Dis* **2002**; 186:74–80.
11. Brosch R, Gordon SV, Marmiesse M, et al. A new evolutionary scenario for the *Mycobacterium tuberculosis* complex. *Proc Natl Acad Sci USA* **2002**; 99:3684–9.
  12. Cole ST, Brosch R, Parkhill J, et al. Deciphering the biology of *Mycobacterium tuberculosis* from the complete genome sequence. *Nature* **1998**; 393:537–44.
  13. Sherman DR, Sabo PJ, Hickey MJ, et al. Disparate responses to oxidative stress in saprophytic and pathogenic mycobacteria. *Proc Natl Acad Sci USA* **1995**; 92:6625–9.
  14. Sherman DR, Voskuil M, Schnappinger D, Liao R, Harrell MI, Schoolnik GK. Regulation of the *Mycobacterium tuberculosis* hypoxic response gene encoding  $\alpha$ -crystallin. *Proc Natl Acad Sci USA* **2001**; 98:7534–9.
  15. Yuan Y, Crane DD, Simpson RM, et al. The 16-kDa  $\alpha$ -crystallin (Acr) protein of *Mycobacterium tuberculosis* is required for growth in macrophages. *Proc Natl Acad Sci USA* **1998**; 95:9578–83.
  16. Smith S, Liggitt D, Jeromsky E, Tan X, Skerrett SJ, Wilson CB. Local role for tumor necrosis factor  $\alpha$  in the pulmonary inflammatory response to *Mycobacterium tuberculosis* infection. *Infect Immun* **2002**; 70:2082–9.
  17. Russell DG. *Mycobacterium tuberculosis*: here today, and here tomorrow. *Nat Rev Mol Cell Biol* **2001**; 2:569–77.
  18. Silver RF, Li Q, Ellner JJ. Expression of virulence of *Mycobacterium tuberculosis* within human monocytes: virulence correlates with intracellular growth and induction of tumor necrosis factor  $\alpha$  but not with evasion of lymphocyte-dependent monocyte effector functions. *Infect Immun* **1998**; 66:1190–9.
  19. Zhang M, Gong J, Yang Z, Samten B, Cave MD, Barnes PF. Enhanced capacity of a widespread strain of *Mycobacterium tuberculosis* to grow in human macrophages. *J Infect Dis* **1999**; 179:1213–7.
  20. Medina E, North RJ. Resistance ranking of some common inbred mouse strains to *Mycobacterium tuberculosis* and relationship to major histocompatibility complex haplotype and *Nramp1* genotype. *Immunology* **1998**; 93:270–4.
  21. North RJ. *Mycobacterium tuberculosis* is strikingly more virulent for mice when given via the respiratory than via the intravenous route. *J Infect Dis* **1995**; 172:1550–3.
  22. Garay SM. Pulmonary tuberculosis. In: Rom WN, Garay SM, eds. *Tuberculosis*. Boston: Little, Brown and Company, **1996**:373–412.
  23. McMurray DN, Collins FM, Dannenberg AM Jr, Smith DW. Pathogenesis of experimental tuberculosis in animal models. *Curr Top Microbiol Immunol* **1996**; 215:157–79.
  24. Orme IM, McMurray DN. The immune response to tuberculosis in animal models. In: Rom WN, Garay SM, eds. *Tuberculosis*. Boston: Little, Brown and Company, **1996**:269–80.
  25. North RJ, Ryan L, LaCourse R, Mogue T, Goodrich ME. Growth rate of mycobacteria in mice as an unreliable indicator of mycobacterial virulence. *Infect Immun* **1999**; 67:5483–5.
  26. Calmette A, Guérin C. Recherches expérimentales sur la défense de l'organisme contre l'infection tuberculeuse. *Ann Inst Pasteur* **1911**; 25: 625–41.
  27. Wards BJ, de Lisle GW, Collins DM. An *esat6* knockout mutant of *Mycobacterium bovis* produced by homologous recombination will contribute to the development of a live tuberculosis vaccine. *Tuber Lung Dis* **2000**; 80:185–9.
  28. Lee MH, Pascopella L, Jacobs WRJ, Hatfull GF. Site-specific integration of mycobacteriophage L5: integration-proficient vectors for *Mycobacterium smegmatis*, *Mycobacterium tuberculosis*, and bacille Calmette-Guérin. *Proc Natl Acad Sci USA* **1991**; 88:3111–5.
  29. Moreira AL, Tsenova L, Murray PJ, et al. Aerosol infection of mice with recombinant BCG secreting murine IFN- $\gamma$  partially reconstitutes local protective immunity. *Microb Pathog* **2000**; 29:175–85.
  30. Rozenberg AM. Investigations of biological activity of the BCG substrains in an experiment. *Probl Tuberk* **1971**; 49:80–5.
  31. Frenette M, Portelance V, Beaudet R. Comparison of the in vivo multiplication of 10 BCG substrains in three strains of mice: no correlation with their antitumor activity. *Microbios* **1983**; 36:173–82.
  32. Lagranderie M, Balazuc AM, Deriaud E, Leclerc CD, Gheorghiu M. Comparison of immune responses of mice immunized with five different *Mycobacterium bovis* BCG vaccine strains. *Infect Immun* **1996**; 64:1–9.
  33. Dunn PL, North RJ. Persistent infection with virulent but not avirulent *Mycobacterium tuberculosis* in the lungs of mice causes progressive pathology. *J Med Microbiol* **1996**; 45:103–9.
  34. Sorensen AL, Nagai S, Houen G, Andersen P, Andersen AB. Purification and characterization of a low-molecular-mass T-cell antigen secreted by *Mycobacterium tuberculosis*. *Infect Immun* **1995**; 63:1710–7.
  35. Ahmad S, Amoudy HA, Thole JE, Young DB, Mustafa AS. Identification of a novel protein antigen encoded by a *Mycobacterium tuberculosis*-specific RD1 region gene. *Scand J Immunol* **1999**; 49:515–22.
  36. Colangeli R, Spencer JS, Bifani P, et al. MTSA-10, the product of the *Rv3874* gene of *Mycobacterium tuberculosis*, elicits tuberculosis-specific, delayed-type hypersensitivity in guinea pigs. *Infect Immun* **2000**; 68: 990–3.
  37. Brusasca PN, Colangeli R, Lyashchenko KP, et al. Immunological characterization of antigens encoded by the RD1 region of the *Mycobacterium tuberculosis* genome. *Scand J Immunol* **2001**; 54:448–52.
  38. Renshaw PS, Panagiotidou P, Whelan A, et al. Conclusive evidence that the major T-cell antigens of the *Mycobacterium tuberculosis* complex ESAT-6 and CFP-10 form a tight, 1:1 complex and characterization of the structural properties of ESAT-6, CFP-10, and the ESAT-6\*CFP-10 complex: implications for pathogenesis and virulence. *J Biol Chem* **2002**; 277:21598–603.
  39. Gey Van Pittius NC, Gamielien J, Hide W, Brown GD, Siezen RJ, Beyers AD. The ESAT-6 gene cluster of *Mycobacterium tuberculosis* and other high G+C Gram-positive bacteria. *Genome Biol* **2001**; 2: research0044.1–0044.18.
  40. Pallen MJ. The ESAT-6/WXG100 superfamily and a new Gram-positive secretion system? *Trends Microbiol* **2002**; 10:209–12.
  41. Lee VT, Schneewind O. Protein secretion and the pathogenesis of bacterial infections. *Genes Dev* **2001**; 15:1725–52.
  42. Hondalus MK, Bardarov S, Russell R, Chan J, Jacobs WR, Bloom BR. Attenuation of and protection induced by a leucine auxotroph of *Mycobacterium tuberculosis*. *Infect Immun* **2000**; 68:2888–98.
  43. Brandt L, Feino Cunha J, Weinreich Olsen A, et al. Failure of the *Mycobacterium bovis* BCG vaccine: some species of environmental mycobacteria block multiplication of BCG and induction of protective immunity to tuberculosis. *Infect Immun* **2002**; 70:672–8.
